# Supplementary material
Source: MDPI journal article supplement (https://www.mdpi.com/2073-4352/8/12/470)
Supplement: s1 [file s1]

Thermal characterization of  $[\text{Zn}(\text{en})\{\text{B}_6\text{O}_7(\text{OH})_6\}]\cdot 2\text{H}_2\text{O}$  (**1**) and  $[\text{Zn}(\text{pn})\{\text{B}_6\text{O}_7(\text{OH})_6\}]\cdot 1.5\text{H}_2\text{O}$  (**2**).

TGA plot  $[\text{Zn}(\text{en})\{\text{B}_6\text{O}_7(\text{OH})_6\}]\cdot 2\text{H}_2\text{O}$  (**1**) with tabulated data.

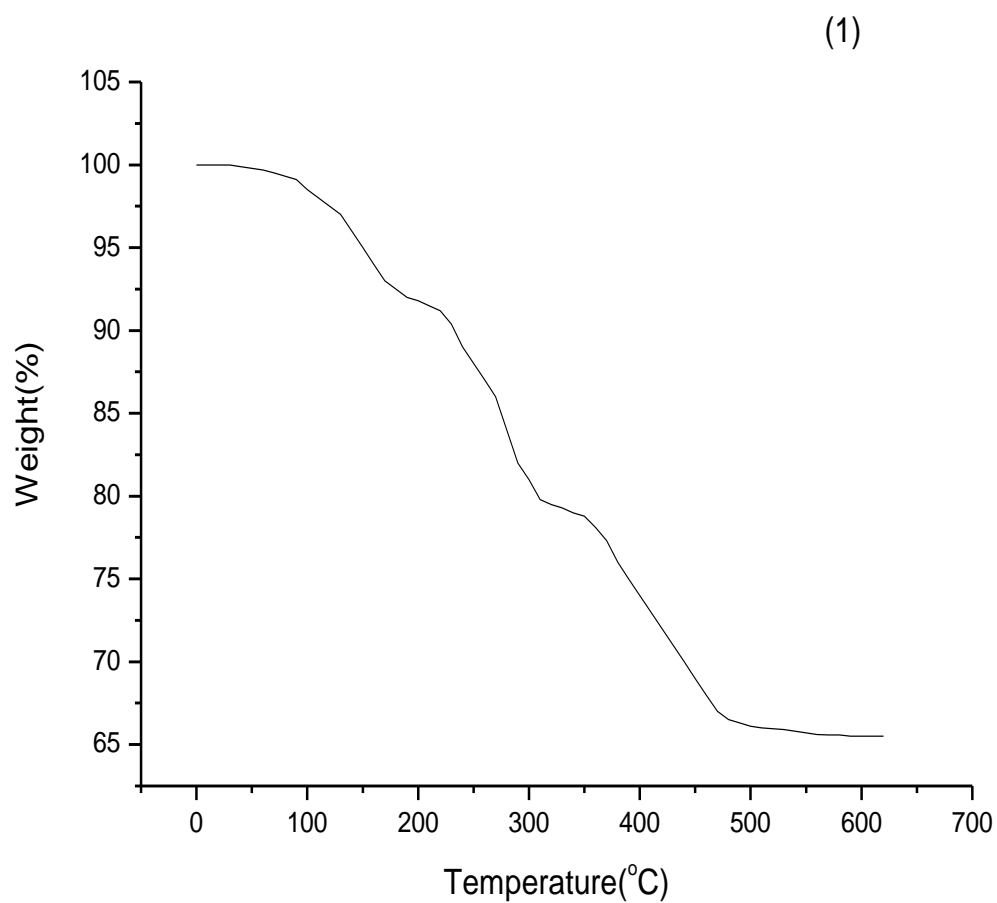

File: C:\...\Znen+B Run Date: 28-Jan-16 15:04  
Program: Universal V3.7A Run Number: 1

TA Instruments Thermal Analysis -- DSC-TGA Standard

Sample: Znen+B

Size: 8.7750 mg  
Cell Constant: 1.0000  
Operator: Mohammed  
Method: Ramp

Exotherm: Up

| Temperature<br>°C | Weight<br>% | Heat Flow<br>W/g |
|-------------------|-------------|------------------|
| 0                 | 100         |                  |
| 10                | 100         |                  |
| 20                | 100         |                  |
| 30                | 100         |                  |
| 40                | 99.9        | -0.5424          |
| 50                | 99.8        | -0.4553          |
| 60                | 99.7        | -0.4136          |
| 70                | 99.5        | -0.3363          |
| 80                | 99.3        | -0.2732          |
| 90                | 99.1        | -0.229           |
| 100               | 98.5        | -0.1815          |
| 110               | 98          | -0.1315          |
| 120               | 97.5        | -0.0826          |
| 130               | 97          | -0.02984         |
| 140               | 96          | 0.02291          |
| 150               | 95          | 0.06585          |
| 160               | 94          | 0.09375          |
| 170               | 93          | 0.108            |
| 180               | 92.5        | 0.1118           |
| 190               | 92          | 0.1059           |
| 200               | 91.8        | 0.08009          |
| 210               | 91.5        | 0.002503         |
| 220               | 91.2        | -0.1716          |
| 230               | 90.4        | -0.4192          |
| 240               | 89          | -0.5285          |
| 250               | 88          | -0.4445          |
| 260               | 87          | -0.3321          |
| 270               | 86          | -0.2636          |
| 280               | 84          | -0.2343          |
| 290               | 82          | -0.2285          |
| 300               | 81          | -0.2342          |
| 310               | 79.8        | -0.2416          |
| 320               | 79.5        | -0.237           |
| 330               | 79.3        | -0.215           |
| 340               | 79          | -0.1609          |
| 350               | 78.8        | -0.06941         |
| 360               | 78.1        | 0.04278          |
| 370               | 77.3        | 0.134            |
| 380               | 76          | 0.1985           |
| 390               | 75          | 0.2444           |
| 400               | 74          | 0.2652           |
| 410               | 73          | 0.2659           |
| 420               | 72          | 0.2587           |
| 430               | 71          | 0.2513           |
| 440               | 70          | 0.2536           |
| 450               | 69          | 0.2627           |
| 460               | 68          | 0.2568           |
| 470               | 67          | 0.2224           |
| 480               | 66.5        | 0.1546           |
| 490               | 66.3        | 0.05573          |
| 500               | 66.1        | -0.06192         |
| 510               | 66          | -0.1767          |

|     |       |         |
|-----|-------|---------|
| 520 | 65.95 | -0.2829 |
| 530 | 65.9  | -0.3706 |
| 540 | 65.8  | -0.4496 |
| 550 | 65.7  | -0.5242 |
| 560 | 65.6  | -0.5964 |
| 570 | 65.59 | -0.6718 |
| 580 | 65.59 | -0.7691 |
| 590 | 65.5  | -0.8961 |
| 600 | 65.5  | -1.051  |
| 610 | 65.5  | -1.209  |
| 620 | 65.5  | -1.354  |

TGA plot  $[\text{Zn}(\text{pn})\{\text{B}_6\text{O}_7(\text{OH})_6\}]\cdot 1.5\text{H}_2\text{O}$  (**2**) with tabulated data.

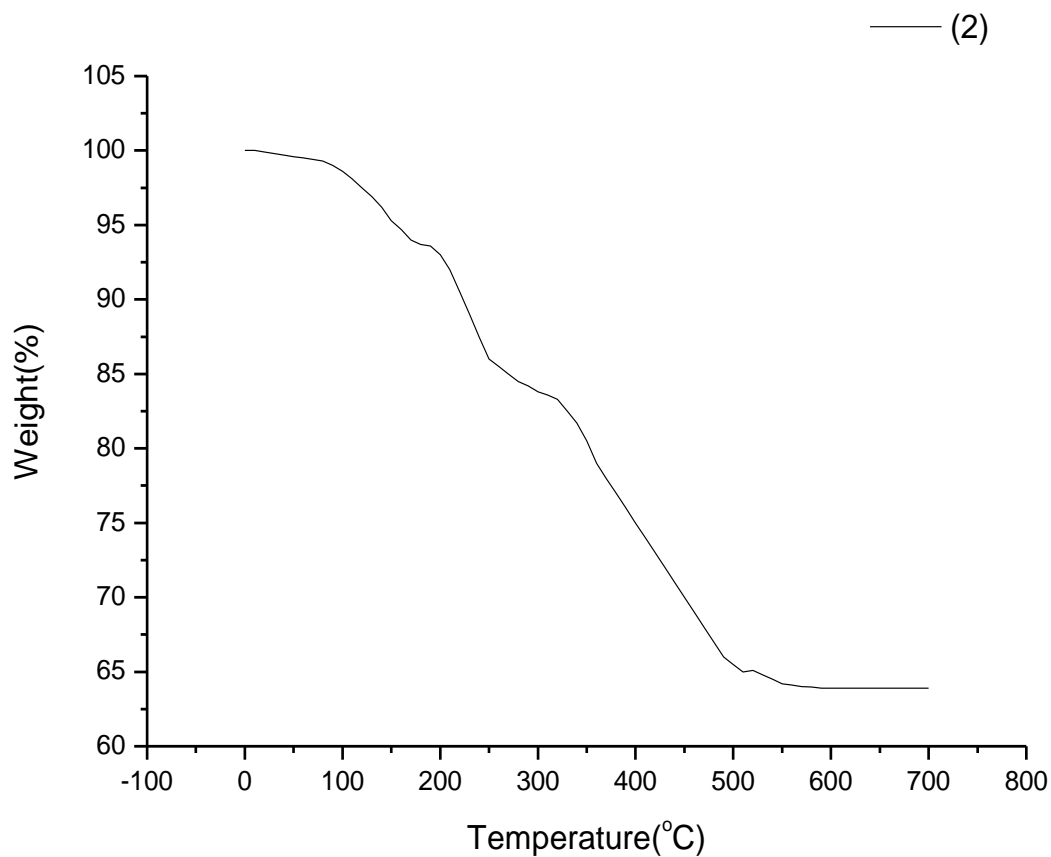

File: C:\...\Znpn+B Run Date: 10-Feb-16 14:10  
 Program: Universal V3.7A Run Number: 1

TA Instruments Thermal Analysis -- DSC-TGA Standard

Sample: Znpn+B  
 Size: 7.23 mg  
 Cell Constant: 1.0000  
 Operator: Mohammed  
 Method: Ramp

Exotherm: Up

| Temperature<br>°C | Weight<br>% | Heat Flow<br>W/g |
|-------------------|-------------|------------------|
| 0                 | 100         |                  |
| 10                | 100         |                  |
| 20                | 99.9        | -1.216           |
| 30                | 99.8        | -0.8054          |
| 40                | 99.7        | -0.5424          |

|     |      |          |
|-----|------|----------|
| 50  | 99.6 | -0.4553  |
| 60  | 99.5 | -0.4136  |
| 70  | 99.4 | -0.3363  |
| 80  | 99.3 | -0.2732  |
| 90  | 99   | -0.229   |
| 100 | 98.6 | -0.1815  |
| 110 | 98.1 | -0.1315  |
| 120 | 97.5 | -0.0826  |
| 130 | 96.9 | -0.02984 |
| 140 | 96.2 | 0.02291  |
| 150 | 95.3 | 0.06585  |
| 160 | 94.7 | 0.09375  |
| 170 | 94   | 0.108    |
| 180 | 93.7 | 0.1118   |
| 190 | 93.6 | 0.1059   |
| 200 | 93   | 0.08009  |
| 210 | 92   | 0.002503 |
| 220 | 90.5 | -0.1716  |
| 230 | 89   | -0.4192  |
| 240 | 87.5 | -0.5285  |
| 250 | 86   | -0.4445  |
| 260 | 85.5 | -0.3321  |
| 270 | 85   | -0.2636  |
| 280 | 84.5 | -0.2343  |
| 290 | 84.2 | -0.2285  |
| 300 | 83.8 | -0.2342  |
| 310 | 83.6 | -0.2416  |
| 320 | 83.3 | -0.237   |
| 330 | 82.5 | -0.215   |
| 340 | 81.7 | -0.1609  |
| 350 | 80.5 | -0.06941 |
| 360 | 79   | 0.04278  |
| 370 | 78   | 0.134    |
| 380 | 77   | 0.1985   |
| 390 | 76   | 0.2444   |
| 400 | 75   | 0.2652   |
| 410 | 74   | 0.2659   |
| 420 | 73   | 0.2587   |
| 430 | 72   | 0.2513   |
| 440 | 71   | 0.2536   |
| 450 | 70   | 0.2627   |
| 460 | 69   | 0.2568   |
| 470 | 68   | 0.2224   |
| 480 | 67   | 0.1546   |
| 490 | 66   | 0.05573  |
| 500 | 65.5 | -0.06192 |

|     |       |         |
|-----|-------|---------|
| 510 | 65    | -0.1767 |
| 520 | 65.1  | -0.2829 |
| 530 | 64.8  | -0.3706 |
| 540 | 64.5  | -0.4496 |
| 550 | 64.2  | -0.5242 |
| 560 | 64.1  | -0.5964 |
| 570 | 64    | -0.6718 |
| 580 | 63.99 | -0.7691 |
| 590 | 63.9  | -0.8961 |
| 600 | 63.9  | -1.051  |
| 610 | 63.9  | -1.209  |
| 620 | 63.9  | -1.354  |
| 630 | 63.9  | -1.49   |
| 640 | 63.9  | -1.622  |
| 650 | 63.9  | -1.729  |
| 660 | 63.9  | -1.814  |
| 670 | 63.9  | -1.901  |
| 680 | 63.9  | -1.964  |
| 690 | 63.9  | -2.014  |
| 700 | 63.9  | -2.035  |
